1 **Title: PRMT5 promotes symmetric dimethylation of RNA processing proteins and modulates**  
2 **activated T cell alternative splicing and Ca<sup>2+</sup>/NFAT signaling**

3

4 Authors: Shouvonik Sengupta<sup>1,2</sup>, Kelsi O. West<sup>6</sup>, Shridhar Sanghvi<sup>7,8</sup>, Georgios Laliotis<sup>9</sup>, Laura M.  
5 Agosto<sup>10</sup>, Kristen Lynch<sup>10</sup>, Philip Tsiichlis<sup>11,12</sup>, Harpreet Singh<sup>7</sup>, Kristin Patrick<sup>13</sup>, Mireia Guerau-de-  
6 Arellano<sup>1,3,4,5,\*</sup>

7

8 <sup>1</sup> School of Health and Rehabilitation Sciences, The Ohio State University, Columbus, OH, USA

9 <sup>2</sup> Biomedical Sciences Graduate Program, The Ohio State University, Columbus, OH, USA

10 <sup>3</sup> Institute for Behavioral Medicine Research, The Ohio State University, Columbus, OH, USA

11 <sup>4</sup> Department of Microbial Infection and Immunity, The Ohio State University, Columbus, OH, USA

12 <sup>5</sup> Department of Neuroscience, The Ohio State University, Columbus, OH, USA

13 <sup>6</sup> Catalytic Data Science

14 <sup>7</sup> Department of Physiology and Cell Biology, The Ohio State University, Columbus, OH, USA

15 <sup>8</sup> Molecular, Cellular and Developmental Biology, The Ohio State University, Columbus, OH, USA

16 <sup>9</sup> Department of Oncology, Johns Hopkins University, Baltimore, MA, USA

17 <sup>10</sup> Department of Biochemistry and Biophysics, University of Pennsylvania, PA, USA

18 <sup>11</sup> Department of Cancer Biology and Genetics, The Ohio State University, Columbus, OH, USA

19 <sup>12</sup> The Ohio State University Comprehensive Cancer Center

20 <sup>13</sup> Department of Microbial Pathogenesis and Immunology, Texas A&M Health Science Center, Bryan,  
21 TX, USA

22

23 \* Corresponding author - Mireia Guerau-de-Arellano, 453 W 10<sup>th</sup> Avenue, Columbus, OH, USA. Tel:  
24 614 293 4176. E-mail: [mireia.guerau@osumc.edu](mailto:mireia.guerau@osumc.edu)

25

26 Competing interest statement: Dr. Guerau-de-Arellano is listed as an inventor in a pending patent of  
27 PRMT5 inhibitors and a licensing deal with Prelude Therapeutics. All other authors declare no conflict  
28 of interest.

29

30

31

32

33

34

35

36

37

## 38 Abstract

39 Protein Arginine Methyltransferase (PRMT) 5 is the major type 2 methyltransferase catalyzing  
40 symmetric dimethylation (SDM) of arginine. PRMT5 inhibition or deletion in CD4 Th cells reduces TcR  
41 engagement-induced IL-2 production and Th cell expansion and confers protection against  
42 experimental autoimmune encephalomyelitis (EAE), the animal model of Multiple Sclerosis. However,  
43 the mechanisms by which PRMT5 modulates T helper (Th) cell proliferation are still not completely  
44 understood and neither are the methylation targets in T cells. In this manuscript, we uncover the role  
45 of PRMT5 on alternative splicing (AS) in activated T cells and identify several targets of PRMT5 SDM  
46 involved in splicing. In addition, we find a possible link between PRMT5 mediated AS of *Trpm4*  
47 (Transient Receptor Potential Cation Channel Subfamily M Member 4) and TcR/NFAT signaling/IL-2  
48 production. This understanding may guide development of drugs targeting these processes to benefit  
49 patients with T cell-mediated diseases.

50

## 51 Introduction

52 CD4 T helper (Th) cells arguably play one of the most critical roles in immunity, by orchestrating  
53 antigen-specific adaptive immunity and enhancing innate immunity via release of cytokines<sup>1</sup>. The  
54 resulting cytokine gradient elicits autocrine and paracrine effects on CD4 Th cells, CD8 T cytotoxic cells,  
55 B cells and myeloid cells. Therefore, a lack of CD4 Th cells substantially impacts both humoral and  
56 cytotoxic immune responses and commonly results in life-threatening infections. In turn, over-  
57 reactive CD4 Th cell responses can lead to the chronic inflammation and tissue destruction observed  
58 in autoimmune disease. Protein Arginine Methyltransferase (PRMT) 5 is a Type II methyltransferase  
59 that catalyzes symmetric dimethylation (SDM) of protein arginines and plays an important role in  
60 development and cancer. Previous work from our lab and others has shown that PRMT5 is induced  
61 after CD4 Th cell activation/autoimmune responses, and that loss of protein arginine  
62 methyltransferase (PRMT)5 reduces TcR engagement-induced Th cell expansion and confers  
63 protection against the mouse model of Multiple Sclerosis, experimental autoimmune  
64 encephalomyelitis (EAE)<sup>2-4</sup>. However, the methylation targets of PRMT5 in T cells and associated  
65 molecular mechanisms are not well defined<sup>5</sup>.

66 A key step for protective immune or pathogenic autoimmune responses is the clonal expansion of  
67 antigen-specific T cells induced by TcR engagement<sup>6</sup>. TcR engagement activates signaling pathways<sup>7</sup>  
68 that lead to Nuclear factor of activated T-cells (NFAT) activation<sup>8</sup> and cell cycle progression<sup>9</sup>. NFAT  
69 activation results in nuclear localization, activation of the IL-2 promoter and IL-2 cytokine  
70 transcription<sup>10</sup>. Once secreted, IL-2 binds the IL-2 receptor in an autocrine and paracrine manner and  
71 promotes T cell growth and proliferation<sup>11</sup>. We have previously seen that PRMT5 can promote IL-2  
72 production, cell cycle progression<sup>12</sup> and T cell proliferation<sup>2</sup>. However, the impact of PRMT5 loss on  
73 TcR/NFAT signaling leading to IL-2 production and T cell proliferation remains unexplored.

74 As a consequence of TcR signaling, T cells undergo dramatic changes in their gene expression  
75 programs. These changes support the transition from naïve to highly proliferating and cytokine-  
76 producing effector T cells. A substantial portion of gene expression modulation occurs at the gene  
77 expression level. However, additional modulation is possible via alternative splicing (AS)<sup>13</sup>. AS is the  
78 process by which exons are included or excluded in the final processed mRNA transcript, resulting in  
79 distinct isoforms from the same gene<sup>14</sup>. AS therefore provides an important layer of gene expression  
80 programming control, by diversifying the proteins that are actually encoded within genes. Previous  
81 work from the Lynch lab has established that antigenic/TcR stimulation modulates the AS gene  
82 expression pattern of T cells<sup>13,15,16</sup> as revealed by RNA-Seq, quantitative microarray, bioinformatics

83 and RT-PCR analyses. The resulting protein isoforms have been linked to functional outcomes such as  
84 TcR  $\alpha$  chain transcription<sup>17</sup>, TcR signal transduction<sup>18</sup> and JNK–CEL2 dependent splicing control<sup>19</sup>,  
85 indicating AS plays crucial functional roles in activated T cell biology.

86 In this manuscript, we explore the specific role of PRMT5 on AS changes induced after T cell activation,  
87 methylation targets of PRMT5 in T cells involved in splicing and potential links between a specific AS  
88 *Trpm4* isoform and altered TcR/NFAT signaling. We find that PRMT5 deletion alters the AS pattern  
89 induced by T cell activation and results in the loss of SDM of proteins involved in splicing, such as Smd  
90 and hnRNPk. We also report specific validated changes in the AS of *Trpm4*, a Ca<sup>2+</sup> responsive Na<sup>+</sup>  
91 channel that plays an important role in total calcium processing and NFAT dependent IL-2 production  
92 in Th cells. Overall, these data conclusively link PRMT5 to TcR-induced AS in T cells and suggest that  
93 altered methylation in splicing proteins and changes in Ca<sup>2+</sup>/NFAT signaling underlie TcR expansion  
94 defects in PRMT5 deficient T cells.

95

## 96 **Materials and Methods**

97

### 98 **Mice**

99 Age-matched 9-13 week-old iCD4-PRMT5<sup>fl/fl</sup> (CD4creER-PRMT5<sup>fl/fl</sup>) and iCD4-PRMT5 <sup>$\Delta/\Delta$</sup>   
100 (CD4creER<sup>+</sup>PRMT5<sup>fl/fl</sup>) mice, described in Webb *et al*<sup>3</sup>, on the C57BL/6 background were used for RNA-  
101 SEq and mass spectrometry. Age-matched 9-13 week-old C57BL/6 background constitutive T-  
102 PRMT5<sup>fl/fl</sup> (CD4cre<sup>+</sup>PRMT5<sup>fl/fl</sup>) and T-PRMT5 <sup>$\Delta/\Delta$</sup>  (CD4cre<sup>+</sup>PRMT5<sup>fl/fl</sup>) mice, also described in Webb *et al*<sup>3</sup>,  
103 were used in the remainder of experiments. Males and females were used in experiments and no  
104 significant differences were observed between genders. Animal use procedures were approved under  
105 Institutional Animal Care and Use Committee protocol number 2013A00000151-R1. All animals were  
106 euthanized under the American Veterinary Medical Association (AVMA) guidelines.

107

### 108 **Deletion of PRMT5 and murine CD4 Th cell isolation *in vivo* tamoxifen treatment**

109 iCD4-PRMT5<sup>fl/fl</sup> and iCD4-PRMT5 <sup>$\Delta/\Delta$</sup>  mice were administered 300mg/kg (7.5  $\mu$ L/g) tamoxifen (Sigma-  
110 Aldrich, catalog no. T5648) by gavage for 5 days, and euthanized 2 days after the last dose for  
111 secondary lymphoid organ (lymph nodes and spleen) harvest. Deletion of PRMT5 in T cells did not  
112 require tamoxifen treatment in T-PRMT5<sup>fl/fl</sup> (CD4cre<sup>+</sup>PRMT5<sup>fl/fl</sup>) and T-PRMT5 <sup>$\Delta/\Delta$</sup>  (CD4cre<sup>+</sup>PRMT5<sup>fl/fl</sup>)  
113 mice. Harvested organs were processed to a cell suspension and subsequently used for CD4 Th cell  
114 isolation. Murine CD4 T cells were isolated from processed lymphoid organs using EasyEights magnet  
115 (Stem Cell Technologies, Catalog no. 18103) and the whole CD4<sup>+</sup> T cell isolation kit (Stem Cell  
116 Technologies, catalog no. 19852). Purity of CD4 T cells was in the range of 87-95%, as measured by  
117 flow cytometry. Additional details on the tamoxifen treatment regimen and mouse immunological  
118 parameters after tamoxifen treatment can be found in Webb *et al*<sup>3</sup>.

119

### 120 **Cell culture**

121 T cells were cultured in EAE media (RPMI + 10% FBS + 2mM L-glutamine + 1:100 Penn-Strep + 1mM  
122 Sodium Pyruvate + 1:100 Minimal essential amino acids + 13mM HEPES + 1:500  $\beta$ -mercaptoethanol).  
123 Unless otherwise indicated, CD4 T cells were activated on coated 5  $\mu$ g/mL CD3 and soluble 2  $\mu$ g/mL

124 CD28 for 48hr in 24-well plates. Human Jurkat T cells with a stable *PRMT5* knockdown were generated  
125 by the Tschlis lab at OSU, as previously described<sup>3</sup>. Briefly, pLx304 DEST EV was used as an empty  
126 vector control cell line (termed EV) and *PRMT5* shRNA (MilliporeSigma, catalog no. SHCLNG-  
127 NM\_006109, clone ID TRCN0000107085) was used to induce the *PRMT5* knockdown cell line (termed  
128 sh*PRMT5*). Cells were cultured in standard Jurkat cell culture media (ATCC) for 24-48hr until desired  
129 confluency was reached prior to downstream processing.

130

#### 131 RNA-Seq

132 Whole CD4<sup>+</sup> T cells from iCD4-*PRMT5*<sup>fl/fl</sup> and iCD4-*PRMT5*<sup>Δ/Δ</sup> mice (n = 3 pooled mice/sample and n = 3  
133 samples per group) were used for RNA-Seq. Samples were either lysed directly *ex vivo* (resting) or  
134 activated (anti-CD3/CD28, no cytokines, 48 hr) before lysis and RNA isolation. RNA isolation was done  
135 with the Direct-zol RNA Miniprep (Zymo Research, catalog no. R2052) according to the manufacturer's  
136 instructions. 1 ng of total RNA was used for quality control (QC), library preparation, and RNA-Seq.  
137 Quality of RNA was evaluated using the Agilent 2100 Bioanalyzer and RNA Nano chip (Agilent  
138 Technologies). Samples with RNA integrity number (RIN) greater than 7.7 were considered for  
139 sequencing. Files pertaining to activated T cells associated with the RNA-Seq experiment can be found  
140 in NCBI's Gene Expression Omnibus (GEO) under the accession number GSE141168. For additional  
141 information on RNA-Seq run and analysis, refer to protocol listed in Webb *et al*<sup>3</sup>. RNA-Seq was  
142 performed by the Genomic Services Laboratory of the Abigail Wexner Research Institute at  
143 Nationwide Children's Hospital, Columbus, Ohio.

144

#### 145 MAJIQ and VOILA

146 Alternative splicing events were analyzed using MAJIQ and VOILA under default parameters (Vaquero-  
147 Garcia et al., 2016). *PRMT5*<sup>fl/fl</sup> mice T cell FastQ files were set as the control group to compare *PRMT5*<sup>Δ/Δ</sup>  
148 files against. In brief, raw junction spanning reads from RNA-Seq fastQ files were aligned to the  
149 GRCh38.p3 assembly of the *Mus musculus* reference from NCBI using STAR RNA-Seq aligner (2.6.0c).  
150 These alignments were fed into MAJIQ to construct splice graphs for transcripts using the RefSeq  
151 annotation and identify both known and novel alternative splicing events in the dataset. All  
152 identifiable local splice variants (LSVs) were analyzed from the splice graphs with minimum reads set  
153 to at least 10 to pass the quantifiable threshold. For each exonic-intronic junction in an LSV, MAJIQ  
154 quantified the expected percent spliced ( $\Psi$ ) value in *PRMT5*<sup>fl/fl</sup> and iCD4-*PRMT5*<sup>Δ/Δ</sup> T cell samples and  
155 the expected change in  $\Psi$  ( $\Delta\Psi$ ) between *PRMT5*<sup>fl/fl</sup> and iCD4-*PRMT5*<sup>Δ/Δ</sup> T cell samples. The VOILA  
156 results were processed with a filter of at least 20% to include high confidence changing LSVs (at least  
157 two junctions with a 95% probability of expected  $\Delta\Psi$  of at least an absolute value of 20  $\Psi$  units ( $\Delta\Psi$   
158  $\geq/\leq$  20) between *PRMT5*<sup>fl/fl</sup> and iCD4-*PRMT5*<sup>Δ/Δ</sup> T cell samples. The high confidence results were  
159 further classified into exon skipping, alternative 5', alternative 3' splice site or intron-retention events.

160

#### 161 Semi quantitative PCR

162 To evaluate mRNA expression, 200–300 ng of RNA were reverse transcribed using oligo d(T) or random  
163 primers and Superscript III (Thermo Fisher Scientific, catalog no. 18080051) according to the  
164 manufacturer's instructions. Samples were run on a Nexus mastercycler (Eppendorf). Exon 20 region  
165 specific primers spanned from exon 19 to exon 21 (Fwd: TCCTCTTCTCCTCTGCGTG, Rev:  
166 ATTCCGGATGAGGCTGTAG. Products- e20 skipped band - 230bp, e20 included band – 408bp). Control

167 primers were on exon 19 (Fwd: CCTCTTCTCTCTGCGTGT, Rev: ATTCCTCTGGGGAATTTG. Product –  
168 150bp). An initial denaturation step at 95°C for 5 minutes was followed by 30 cycles of denaturation  
169 at 95°C for 30s, annealing at 54°C for 1 min, extension at 72°C for 30s. PCR products were run on 1.5%  
170 agarose gels with 0.5% TBE buffer. E20 skipped PCR products were confirmed by use of nested primers  
171 (Fwd: GCC CTC ATG ATT CCA GGT AA, Rev: TCC AGT AGA GGT CGC TGT TG) and Sanger sequencing was  
172 performed at the OSUCCC genomic shared resources.

173

#### 174 Assessment of calcium signaling in T cells

175 Isolated activated (anti-CD3/CD28 – 2.5ug/ml, 50U IL-2, 48hr) CD4<sup>+</sup> T cells from PRMT5<sup>fl/fl</sup> and T-  
176 PRMT5<sup>Δ/Δ</sup> mice were plated on poly-L lysine (Millipore Sigma, catalog no. P8920-100ML) coated glass-  
177 bottom dishes (Cellvis 35 mm - 14 mm micro-well #1.5 cover glass, Fisher Scientific, catalog no.  
178 NC0794151) for 120 min. Cells were then treated with 10 μmol Fluo-4-AM (Invitrogen, catalog no.  
179 F14201) dye for 30 min in DMEM (without phenol red and glutamine; catalog no. 11054020) at 5%  
180 CO<sub>2</sub> in a humidifying incubator at 37°C. Then the dye was washed out and cells were incubated for 30  
181 min in modified EAE media supplemented with 10% FBS for de-esterification. Following de-  
182 esterification, cells were switched to modified Ringer's solutions with 0 mM Ca<sup>2+</sup> (120 mM NaCl, 5 mM  
183 KCl, 1 mM MgCl<sub>2</sub>, 25 mM NaHCO<sub>3</sub>, and 5.5 mM D-glucose, pH 7.3) for imaging with a Nikon A1R-HD  
184 laser-scanning confocal microscope. Fluo-4 was excited using 488 nm laser and fluorescence emission  
185 was detected at 500-550 nm. Resting Ca<sup>2+</sup> baseline was recorded for 150 sec prior to addition of  
186 sarcoplasmic reticulum Ca<sup>2+</sup>-ATPase (SERCA) inhibitor thapsigargin (2μM). After 150 sec CaCl<sub>2</sub> (2mM)  
187 was added and calcium uptake was monitored for 600 sec. The data are represented as ΔF/F<sub>0</sub> vs. time,  
188 where F<sub>0</sub> is basal fluorescence and ΔF=F-F<sub>0</sub>.

189

#### 190 Immunocytochemistry

191 Isolated activated (5 μg/ml anti-CD3 and soluble 2 μg/ml CD28, 48hr) CD4<sup>+</sup> T cells from PRMT5<sup>fl/fl</sup> and  
192 T-PRMT5<sup>Δ/Δ</sup> mice were plated on poly-L lysine (Millipore Sigma, catalog no. P8920-100ML) coated glass  
193 cover slips for 120min. Cells were then stained with wheat germ agglutinin for 10 min prior to fixing  
194 with 4% paraformaldehyde (Electron Microscopy Sciences, catalog no. 15713) for 10 min and  
195 permeabilization with 0.5% Triton-X 100 for 10 min. Samples were blocked with 10% normal goat  
196 serum for 10 min and incubated in NFATc1 antibody (Santa Cruz Biotechnology, catalog no. sc-7294)  
197 overnight at 4°C. Samples were then incubated in secondary antibody conjugates Atto 647N (1 μg/mL  
198 each of anti-mouse; Sigma catalog no. 50185-1ML-F) for 60min, followed by 10.9 mM DAPI (1:10,000)  
199 (Sigma catalog no. D9542) staining for 10 min. Coverslips were mounted with ProLong™ gold antifade  
200 (Invitrogen, catalog no. P36930) and cells were imaged with Nikon A1R high-resolution confocal  
201 microscopy. NFAT and nuclear stain colocalization index<sup>20</sup> was calculated using ImageJ. Pearson's R  
202 value with no threshold condition was selected for the calculation of colocalization index.

203

#### 204 Flow cytometry

205 For flow cytometry, 48-hour activated T cells from PRMT5<sup>fl/fl</sup> and T-PRMT5<sup>Δ/Δ</sup> mice were fixed with 4%  
206 paraformaldehyde (Electron Microscopy Sciences, catalog no. 15713) for 10 min in V-bottom plates  
207 (Costar, catalog no. 3897). Samples were blocked with 5% normal goat serum for 1 hr and incubated  
208 in anti-TRPM4 (Abcam, catalog no. ab106200) or normal mouse IgG (Santa Cruz Biotechnology, catalog  
209 no.sc-2025) antibodies overnight. Samples were then incubated in goat anti-rabbit IgG Alexa Fluor-

210 488 conjugated (Abcam, catalog no. ab150085) secondary for 60 min the next day prior to washing  
211 and running on FACSCalibur with DXP multicolor upgrades (Cytex). Analysis was performed using  
212 FlowJo\_V10.

213

#### 214 Cytokine ELISA

215 IL-2 cytokine in 48 hr supernatants of activated T cells from PRMT5<sup>fl/fl</sup> and T-PRMT5<sup>Δ/Δ</sup> mice was  
216 analyzed by sandwich enzyme-linked immunosorbent assay (ELISA). Murine IL-2 ELISA capture (catalog  
217 no. 14-7022-85) and detection (catalog no. 13-7021-85) antibody reagents were purchased from  
218 Invitrogen/eBioscience. The capture antibody was coated overnight at 2 μg/ml in coating buffer (0.1M  
219 NaHCO<sub>3</sub>, pH 9.5). The following day, plates were washed with 0.1% PBS/Tween-20 solution and  
220 blocked with 1% BSA/PBS for 2 hr. Following blocking, 100 μL of IL-2 standard (Invitrogen eBioscience,  
221 catalog no. 14-8021-64) or supernatants are added to the wells. Plates were incubated overnight at  
222 4°C and, the following day, plates were washed with 0.1% PBS/Tween-20 solution and 100 ul of  
223 detection antibody diluted in 1% BSA/PBS was added to the wells for 60 min, followed by 2.5 μg/ml  
224 avidin-peroxidase prepared in 1% BSA/PBS for 30 min. After washes, 0.1% H<sub>2</sub>O<sub>2</sub>/ABTS was added to  
225 the wells and the developed color signal was read at 405 nm on the SpectraMax Plus 384 plate reader  
226 (Molecular devices) at 2 – 15 min.

227

#### 228 Mass spectrometry

229 Isolated resting and activated (anti-CD3/CD28, no cytokines, 2 days) CD4<sup>+</sup> T cells from iCD4-  
230 PRMT5<sup>fl/fl</sup> and iCD4-PRMT5<sup>Δ/Δ</sup> mice ( $n = 3$  pooled mice/sample and  $n = 3$  samples/group) were lysed in  
231 our in-house lysis buffer (50 mM triethylammonium bicarbonate, Millipore Sigma, catalog no. T7408-  
232 500ML + 0.05% n-Dodecyl β-D-maltoside, Millipore Sigma, catalog no. D4641-1G). Protein was  
233 quantified using Pierce BCA kit (Thermo Fisher, catalog no.23225) and 30 μg was used for  
234 immunoprecipitation (IP). IP with the SYM10 antibody (Millipore Sigma, catalog no.07-412) was done  
235 according to manufacturer's instructions using the Pierce A/G magnetic beads (Thermo Fisher, catalog  
236 no.88802). Liquid Chromatography with tandem mass spectrometry (LC-MS/MS) was performed on  
237 IP samples using an Orbitrap fusion mass spectrometer equipped with an EASY-Spray™ Sources  
238 operated in positive ion mode by the OSU-Genomics Shared Resources (GSR). Samples were separated  
239 on an easy spray nano column (Pepmap™ RSLC, C18 3μ 100A, 75μm X150mm Thermo Scientific)  
240 using a 2D RSLC HPLC system from Thermo Scientific. Each sample was injected into the μ-Pre-column  
241 Cartridge (Thermo Scientific,) and desalted with 0.1% Formic Acid in water for 5 minutes. The injector  
242 port was then switched to inject the sample and the peptides were eluted off of the trap onto the  
243 column. Mobile phase A was 0.1% Formic Acid in water and acetonitrile (with 0.1% formic acid) was  
244 used as mobile phase B. Flow rate was set at 300nL/min Mobile phase A was 0.1% Formic Acid in water  
245 and acetonitrile (with 0.1% formic acid) was used as mobile phase B. Flow rate was set at 300nL/min.  
246 Typically, mobile phase B was increased from 2% to 35% to 55% in 125 and 23 min and then increased  
247 from 55 to 90% in 10min and then kept at 95% for another 5 min before being brought back quickly  
248 to 2% in 2 min. The column was equilibrated at 2% of mobile phase B (or 98% A) for 15 min before the  
249 next sample injection. MS/MS data was acquired with a spray voltage of 1.7 KV and a capillary  
250 temperature of 275 °C is used. The scan sequence of the mass spectrometer was based on the preview  
251 mode data dependent TopSpeed™ method: the analysis was programmed for a full scan recorded  
252 between  $m/z$  375 – 1700 and a MS/MS scan to generate product ion spectra to determine amino acid  
253 sequence in consecutive scans starting from the most abundant peaks in the spectrum in the next 3

254 seconds. To achieve high mass accuracy MS determination, the full scan was performed at FT mode  
255 and the resolution was set at 120,000. EASY-IC was used for internal mass calibration. The AGC Target  
256 ion number for FT full scan was set at  $4 \times 10^5$  ions, maximum ion injection time was set at 50 ms and  
257 micro scan number was set at 1. MSn was performed using ion trap mode to ensure the highest signal  
258 intensity of MSn spectra using both HCD methods (30%). The AGC Target ion number for ion trap MSn  
259 scan was set at 10000 ions, maximum ion injection time was set at 30 ms and micro scan number was  
260 set at 1. Dynamic exclusion is enabled with a repeat count of 1 within 60s and a low mass width and  
261 high mass width of 10ppm.

262

## 263 Mass spectrometry analyses

264 Label free quantitation<sup>21</sup> was performed using the spectral count approach, in which the relative  
265 protein quantitation is measured by comparing the number of MS/MS spectra identified from the  
266 same protein in each of the multiple LC/MSMS datasets. Scaffold (Proteome Software, Portland,  
267 OR) was used for data analysis. Results were filtered with 95% confident level first. Only proteins pass  
268 1% FDR and have a minimal of 2 unique peptides were considered as valid identification.

## 269 Western blotting and immunoprecipitation

270 Activated whole CD4<sup>+</sup>T cells and Jurkat cells were pelleted and frozen at  $-80^{\circ}\text{C}$ . Samples were lysed in  
271 RIPA buffer (10 mM Tris pH 7.4, 150 mM NaCl, 1% Triton X-100, 0.1% SDS, 1% deoxycholate) for  
272 western blotting (WB) and IP lysis buffer for immunoprecipitation (50mM Tris, 150mM NaCl, 1% NP-  
273 40, 0.1% Triton-X 100, 0.5% Sodium Deoxycholate). 4-10  $\mu\text{g}$  of protein was run for the WB and 40-50  
274  $\mu\text{g}$  of initial protein was used for IP. Input samples were loaded as 10% of IP protein loading. Samples  
275 were run on 7.5% SDS-PAGE gels and transferred onto nitrocellulose membranes. Blots were blocked  
276 with 1% milk protein in TBS-Tween(0.1%). IP was performed according to manufacturer's instructions  
277 provided by Santa Cruz Biotechnology. IP antibodies used were hnRNP K (Abcam, catalog no. -  
278 ab39975) and normal mouse IgG (Santa Cruz Biotechnology, catalog no. sc-2025). Protein A/G Plus  
279 Agarose beads were used for the pull down (Santa Cruz Biotechnology, catalog no. sc-2003). Additional  
280 information on protein isolation, western blotting, IP and blot imaging procedures can be found in  
281 Webb *et al*<sup>3</sup>.

282

## 283 Statistics

284 Statistical analyses were done using the GraphPad Prism software (v9). 2-tailed Student's t test or  
285 One-way ANOVA followed by Tukey's or Sidak's post hoc multiple-comparisons test was performed as  
286 appropriate. Raw RNA-Seq data was normalized and post-alignment statistical analyses were  
287 performed using DESeq2 and custom analysis scripts written in R.

288

## 289 Results

### 290 PRMT5 modulates T cell activation-dependent alternative splicing

291 Substantial AS modulation occurs in response to TcR stimulation of Jurkat T cells<sup>15</sup>. However, the  
292 contribution of PRMT5 to TcR stimulation-dependent AS changes is unknown. To address this, we  
293 leveraged our recently developed conditional CD4 T cell-specific PRMT5knockout (KO) mouse model<sup>3</sup>,  
294 RNA-Seq and bioinformatics tools to identify and analyze alternative splicing events. We isolated

295 purified CD4 Th cells from iCD4-PRMT5<sup>fl/fl</sup> and iCD4-PRMT5<sup>Δ/Δ</sup> mice in resting vs. anti-CD3/CD28-  
296 activated conditions (henceforth referred to as activated/abbreviated as act) for paired-end RNA-Seq  
297 (**Fig. 1A**). Detection, quantification and visualization of local splicing variants (LSV) from RNA-Seq data  
298 was then achieved with the MAJIQ (Modeling Alternative Junction Inclusion Quantification) and Voila  
299 software packages created in the Barash lab<sup>22</sup>. MAJIQ software is, in theory, capable of detecting any  
300 splicing events involving two or more junctions, including not previously annotated splicing events.

301 We first used MAJIQ to evaluate AS changes occurring as a consequence of primary murine CD4 Th  
302 cell activation in control, PRMT5-sufficient T cells. We tuned our analysis to identify the LSVs (defined  
303 as all possible splits in the exon boundary that have events), alternative junctions (AJs, defined as LSVs  
304 with two or more junctions having 20-80% of reads coming into/going out of the junction being  
305 considered) and the genes where these AS changes occurred. MAJIQ identified 9071 AJs  
306 corresponding to 3649 events impacting 1921 genes (**Fig. 1B**) upon activation of primary CD4 Th cells  
307 (comparing resting vs activated PRMT5<sup>fl/fl</sup> T cells). Next, we evaluated whether the alternative splicing  
308 pattern observed in activated T cells was altered by PRMT5 deletion (comparing activated PRMT5<sup>fl/fl</sup>  
309 vs PRMT5<sup>Δ/Δ</sup> T cells). We observed that PRMT5 loss resulted in changes in 2590 AJs corresponding to  
310 857 splicing events over 503 genes (**Fig. 1C**). These results indicate that PRMT5 regulates an important  
311 portion (~16%) of the activated T cell AS gene expression profile.

312 To determine whether there were activated T cell AJs that were unique to PRMT5 deficient or PRMT5-  
313 sufficient conditions, we performed a  $\Delta\Psi$  (change in percent spliced index) analysis on AJs showing  
314 splicing site usage 20% of the time or higher. Doing so, we see almost an even split of alternative  
315 junctions present in each group – unchanged (below 20% splicing site usage: 38.4% or 996 AJs), PRMT5  
316 sufficient ( $\Delta\Psi \leq -20\%$ : 31.5% or 817 AJs) and PRMT5 deficient ( $\Delta\Psi \geq 20\%$  - 30% or 777 AJs) (**Fig. 1D**).  
317 Similar analyses comparing PRMT5 sufficient vs deficient T cells in the resting state showed limited AS  
318 occurring in resting T cells, with few, albeit some differences in AS splicing (408 AJs corresponding to  
319 127 LSVs over 74 genes, Supplemental Figure 1). Collectively, the above data indicate that the loss of  
320 PRMT5 leads to a distinct splicing profile in primary T cells, particularly in activated T cells.

321

322 Finally, we evaluated the distribution of AS type (alternative 5' or 3' splice site usage, exon skipping  
323 and intron retention) observed in PRMT5 deficient activated T cells. Among the 2590 alternative  
324 junctions modulated by PRMT5, exon skipping (46.5%) was the most frequent with PRMT5 loss, closely  
325 followed by intron retention (28%), while alternative 5' or 3' junctions were less frequent (**Fig. 1E**).  
326 These results suggest that PRMT5 expression in T cells results in substantial and non-random changes  
327 in AS, which presumably modulate T cell biology and function. Our results raise the question of how  
328 PRMT5 is regulating splicing. Regulation could be via RNA binding protein (RBP) methylation, TCR  
329 signaling and/or RNA splicing protein methylation in T cells.

### 330 **PRMT5 methylates spliceosome Sm proteins and the RNA binding protein hnRNP K**

331 PRMT5 has been described as a crucial player in spliceosomal assembly via symmetric dimethylation  
332 (SDM) of Sm proteins<sup>23</sup>. However, the spliceosomal or other methylation targets of PRMT5 in T cells  
333 are largely unknown. We hypothesized that PRMT5 methylates splicing proteins/regulatory factors in  
334 activated T cells. To study this, we first performed an unbiased pull down of SDM proteins in iCD4-  
335 PRMT5<sup>fl/fl</sup> and iCD4-PRMT5<sup>Δ/Δ</sup> T cells, using the SYM10 antibody that recognizes symmetrically  
336 dimethylated RGG and subjected the SDM target-enriched samples to mass spectrometry (**Fig. 2A**).  
337 We then used the Scaffold software to identify putative methylation targets. We focused on  
338 symmetrically dimethylated targets that were more highly recovered in activated iCD4-PRMT5<sup>fl/fl</sup>



339 condition compared to the activated iCD4-PRMT5<sup>Δ/Δ</sup> condition. From this, we observed a number of  
340 splicing related proteins that were recovered in PRMT5-sufficient but not, or to a lesser extent, in  
341 PRMT5-deleted activated T cells. For our analysis, we graphed the raw spectral reads of the targets.

342 Sm proteins SMD1, D2 and D3, which are responsible for the Sm-ring formation step required for  
343 spliceosome formation<sup>24</sup> (**Fig 2 B-D**), were recovered significantly less in PRMT5 deficient activated T  
344 cells. However, methylated Sm protein recovery was similar between resting and activated wild-type  
345 T cells. Recovery of other splicing-related proteins such as SNRPA1, SNRNP70, SNRPA that help with  
346 spliceosomal assembly (aiding the binding of stem loop (SL)IV of U2 snRNA, SLI and SLII to U1 snRNA  
347 respectively)<sup>25,26</sup> or HNRNPA3 which helps with cytoplasmic trafficking of RNA<sup>27</sup> did not significantly  
348 decrease with PRMT5 deletion (**Fig. 2 E-H**). However, recovery of HNRNPK, an RBP that assists in the  
349 maturation of pre-mRNAs into mRNAs, stabilizes the mRNA during transport and controls the  
350 translation of the mRNA<sup>28</sup> (**Fig. 2I**), followed the expected changes after T cell activation and PRMT5  
351 loss. Specifically, HNRNPK recovery increased after T cell activation, when PRMT5 is induced, but  
352 decreased with PRMT5 deletion (**Fig. 2I**). Based on the role of hnRNP K in RNA splicing and the PRMT5-  
353 dependent recovery of methylated HNRNPK in activated T cells, we further validated this target in T  
354 cells. We performed a 'reverse' IP where we pulled down the target HNRNPK in activated T cells from  
355 iCD4-PRMT5<sup>fl/fl</sup> and iCD4-PRMT5<sup>Δ/Δ</sup> mice or control vs. PRMT5 shRNA-modified human Jurkat T cells  
356 and probed with SYM10 (**Fig. 2, KJ**). We observed significantly reduced detection of methylated  
357 HNRNPK in cells from PRMT5 knockout murine (**Fig. 2J, L**) and a trend in human (**Fig. 2K, M**) T cells,  
358 suggesting hnRNP K methylation contributes to PRMT5-dependent AS changes that occur upon T cell  
359 activation.

### 360 T cell *Trpm4* exon inclusion is controlled by PRMT5

361 Our data so far support that PRMT5 promotes AS changes in activated T cells that have the potential  
362 to modulate T cell biology and function. To evaluate the immunological significance of genes whose  
363 alternative splicing is regulated by PRMT5, we ran the list through the immune effector processes  
364 node (GO: 0002697, **Fig. 3A**) in the gene ontology knowledgebase. Immune genes whose splicing is  
365 modulated by PRMT5 corresponded to subcategories in Fc receptor signaling (GO:0038093), TCR  
366 signaling (GO:0050852) and regulation of T cell cytokine production (GO:0002724). Within the  
367 regulation of T cell cytokine production subfamily, transient receptor potential melastatin 4 (*Trpm4*)  
368 was of interest in the context of our model because it has been shown to regulate Ca<sup>2+</sup> signaling and  
369 IL-2 production<sup>2</sup>. Therefore, we studied PRMT5's impact on *Trpm4* AS further.

370 To visualize PRMT5-dependent LSV events in *Trpm4*, we used the VOILA tool within MAJIQ, which  
371 provides a sashimi plot that shows several exon junction connections entering or leaving a reference  
372 exon. This analysis showed that our PRMT5<sup>Δ/Δ</sup> T cells have increased RNA-Seq reads for the skipping  
373 of exon 20 (61 vs. 9 in PRMT5<sup>fl/fl</sup>, **Fig. 3B**). This observation is better visualized in the percent spliced  
374 index ( $\Psi$ ) provided by VOILA. The violin plots (**Fig. 3C**) show the inclusion or skipping probability of  
375 *Trpm4* exon 20 in the PRMT5<sup>fl/fl</sup> and PRMT5<sup>Δ/Δ</sup> conditions. We observe 91.7% usage of exon 20 inclusion  
376 in the PRMT5<sup>fl/fl</sup> condition (**Fig. 3C, left**), which drops to 57% usage in the PRMT5<sup>Δ/Δ</sup> condition (**Fig. 3C,**  
377 **right**). These *in silico* findings were confirmed in lab via semi-quantitative PCR amplification of a  
378 fragment encompassing exon 19 to exon 21. We observed a significant increase in the skipped product  
379 in the PRMT5 deficient condition and a significant decrease in the included/non-skipped product in  
380 the PRMT5 deficient condition (**Fig. 3D**), red corresponds to PRMT5 sufficient and blue to the PRMT5  
381 deficient condition). To elucidate the biological significance of a loss of exon 20 in murine *Trpm4*, we  
382 consulted the Ensembl database. We found that the loss of exon 20 leads to nonsense mediated decay  
383 (NMD) due to an out-of-frame shift (178bp). Based on this, and the fact that there is an increase in the  
384 skipped product in the iCD4-PRMT5<sup>Δ/Δ</sup> condition, we hypothesized that there is a loss of functional

385 TRPM4 channels in the PRMT5 knockout T cells. We evaluated this by performing flow cytometry for  
386 TRPM4 in whole CD4 T cells. We observed that TRPM4<sup>hi</sup> and TRPM4<sup>lo</sup> populations can be observed in  
387 wild-type iCD4-PRMT5<sup>fl/fl</sup> Th cells. However, loss of PRMT5 resulted in a significant loss of the Trpm4<sup>hi</sup>  
388 population, and a significant increase in the TRPM4<sup>lo</sup> population (**Fig. 3E-F**). Decreases in TRPM4 MFI  
389 were also observed for the TRPM4 hi population in PRMT5 deficient T cells (**Fig. 3F**). We interpret this  
390 result as lack of PRMT5 limiting the TRPM4<sup>hi</sup> population in activated CD4 T cells, what likely impairs T  
391 cell activation and or expansion.

#### 392 **PRMT5 promotes Calcium signaling, NFAT nuclear localization and IL-2 secretion**

393 TcR signaling induces entry of Calcium (Ca<sup>2+</sup>), which acts as a secondary messenger in T cell signaling  
394 pathways<sup>29</sup>. To properly activate the transcriptional programs necessary for effective immune  
395 responses, appropriate Ca<sup>2+</sup> signal amplitude and duration are necessary<sup>30</sup>, which requires  
396 depolarization via loss of other cations. TRPM4 is a Ca<sup>2+</sup> activated Na<sup>+</sup> channel that permits calcium  
397 oscillation by inducing depolarization, thereby allowing sustainably elevated Ca<sup>2+</sup> levels<sup>31</sup>. Ca<sup>2+</sup> in turn  
398 activates calcineurin and promotes NFAT nuclear translocation and *Il-2* gene transcription<sup>32</sup>. If PRMT5-  
399 dependent *Trpm4* AS alters TRPM4 function, we would expect altered Ca<sup>2+</sup> signaling. To study whether  
400 PRMT5 modulates the calcium signaling profile in our mouse model, we performed a 600-second trace  
401 of calcium uptake in PRMT5<sup>Δ/Δ</sup> and PRMT5<sup>fl/fl</sup> T cells (**Fig. 4A**). Cells were kept in a zero-calcium media  
402 condition and treated with the ER calcium release inhibitor thapsigargin prior to addition of Ca<sup>2+</sup> to  
403 the media. This strategy provides a system to specifically study cytosolic calcium entry and plasma  
404 membrane channel response. Quantification of the 'plateau' region of the trace after CaCl<sub>2</sub> addition  
405 showed that the PRMT5<sup>Δ/Δ</sup> T cells have a significant reduction in total cytosolic calcium uptake (**Fig.**  
406 **4B**). To determine if the expected outcome of Ca<sup>2+</sup> signaling in T cells, nuclear localization of NFAT  
407 transcription complexes, was also affected, we performed NFATc1 immunocytochemistry staining. We  
408 observed a decrease in nuclear localization in the PRMT5<sup>Δ/Δ</sup> T cells (**Fig. 4C**, red – NFATc1, blue – DAPI).  
409 The quantification of these results confirmed a significant decrease in nuclear localization of NFATc1  
410 in PRMT5<sup>Δ/Δ</sup> T cells (**Fig.4D**). Finally, it's been established that NFAT nuclear localization in activated T  
411 cells promotes the expression of interleukin (IL)-2 and we have previously observed decreased IL-2  
412 after PRMT5 inhibition or KO. As expected from our prior work and the role of NFAT as an IL-2 driver,  
413 PRMT5 deleted T cells secreted far less IL-2 upon T cell activation (**Fig. 4E**).

414

#### 415 **Discussion**

416 The main goal of this work was to explore the role of PRMT5 on AS changes in T cells and identify  
417 methylation targets of PRMT5 in T cells. We find that PRMT5 symmetrically dimethylates several  
418 proteins involved in RNA processing, including SmDs and HNRNPK, and is required for a portion of the  
419 AS pattern induced by T cell activation. We additionally found that PRMT5 modulates the splicing of a  
420 sodium channel that modulates calcium processivity, namely *Trpm4*, and promotes NFAT signaling  
421 and IL-2 production in Th cells.

422 A substantial contribution of alternative splicing to gene expression changes induced by T cell  
423 activation was initially recognized in 2007<sup>13,15</sup>. More recently, it has been shown that a number of AS  
424 changes in activated T cells translate to differential protein isoform expression and changes in T cell  
425 function<sup>16,33,34</sup>. T cell activation-dependent AS changes impact genes that modulate a range of T cell  
426 processes, from signaling, migration or fate decisions, to proliferation<sup>15,19,35</sup>. We have previously  
427 shown that PRMT5 induction after T cell activation<sup>4</sup> promotes activation-induced cell cycle  
428 progression<sup>12</sup> and proliferation<sup>2,3</sup>. The MAJIQ analyses of PRMT5 sufficient and deficient T cells in the

429 current work show that PRMT5 controls approximately 16% of T cell activation induced AS shifts. Such  
430 shifts occurred in genes involved in TcR, Fc and cytokine signaling, as well as other immune processes.  
431 In addition, we provide evidence that control of AS by PRMT5 is active in primary murine T cells in  
432 which loss of PRMT5 impacts T cell proliferation, NFAT signaling and IL-2 secretion. While our work  
433 does correlatively link these processes, future work will need to demonstrate whether specific AS  
434 changes in specific genes are necessary and/or sufficient to influence function.

435 The contribution of PRMT5 to alternative splicing was first recognized in plants<sup>36</sup>. Since then, the role  
436 of PRMT5 in splicing has been studied in hematopoietic stem cells<sup>37</sup>, neural stem/progenitor cells<sup>38</sup>,  
437 monocytic leukemia cells<sup>39</sup> and murine glioma cells<sup>40</sup>, among others. These studies evidenced that  
438 PRMT5 mediated splicing is crucial in modulating DNA repair genes<sup>37</sup>, MDM4<sup>38</sup> and avoiding intron  
439 retention<sup>39,40</sup>. Metz *et al*<sup>41</sup> studied the impact of PRMT5 small molecule inhibitors in human T cell  
440 splicing and concluded that a global reduction in SDM levels altered the splicing of a limited set of  
441 mRNA transcripts and selectively prevented TcR and pattern recognition receptor (PRR) dependent  
442 upregulation of *IFNB1* and *IFNL1*. We now show the extent to which genetic loss of PRMT5 controls  
443 splicing and find that PRMT5 controls a substantial portion of TcR-induced AS changes. As Metz *et al*  
444 found, not all mRNAs in our dataset appear to require PRMT5 for processing. How exactly this is  
445 achieved is currently unknown. However, TcR-induced splicing has been shown to be highly  
446 dependent on CELF2 induction and binding to specific mRNA sites<sup>17,35,42</sup>, leading to the intriguing  
447 possibility that interactions between PRMT5 and CELF2 may contribute to selective splicing regulation  
448 of a group of transcripts required for activated T cell function.

449 We observe significantly less SmD1, SmD2, SmD3 and SNRPA1 methylation in activated PRMT5  
450 deficient T cells. Sm proteins were the first identified methylation targets of PRMT5 that modulate  
451 RNA processing. Specifically, SmD1, SmD3, SmB and SmB' were found to be SDM on RG motifs by  
452 PRMT5. Methylated Sm proteins then bind SMN and accelerate U snRNP assembly<sup>23,43-45</sup>. Therefore,  
453 PRMT5 appears to regulate early stages of spliceosomal assembly, during SMN binding and Sm ring  
454 formation. We also observe a significant loss of SDM of hnRNP K with PRMT5 loss in mouse activated  
455 T cells. hnRNPs are involved in RNA metabolism processes such as mRNA export, localization, stability  
456 and translation<sup>46</sup>. hnRNPA1 methylation by PRMT5 promotes IRES-dependent translation of *CCND1*,  
457 *MYC*, *HIF1a* and *ESR1* genes<sup>47</sup>. Additional work is now showing that hnRNPs modulate alternative  
458 splicing of pyruvate-kinase isozyme splicing<sup>48</sup>, insulin receptor gene splicing<sup>49</sup>, *CD45* alternative  
459 splicing<sup>50</sup> and regulate innate immunity gene control in macrophages<sup>51</sup>. Although further work  
460 demonstrating that methylated hnRNP mediates the observed AS changes will be necessary, our data  
461 suggest a role for hnRNP K methylation in PRMT5-dependent AS changes observed in T cells.

462 We found and validated *Trpm4* as an alternative splicing target of PRMT5 that is, as a consequence,  
463 substantially repressed at the protein level in PRMT5 deficient activated T cells. The TRPM family of  
464 channels is expressed in several immune cells<sup>52</sup>, where it controls cell proliferation, survival and  
465 cytokine production<sup>53</sup>. While research on how TRPM4 contributes to T cell Ca<sup>2+</sup> release, NFAT signaling  
466 and IL-2 secretion has yielded contradictory results<sup>31,53</sup>, we observe reductions of all three parameters  
467 in PRMT5<sup>Δ/Δ</sup> T cells. We hypothesize this is due to reduced TRPM4 leading to lower calcium  
468 processivity. This finding could be important to explore when targeting ion channels to treat  
469 autoimmune neuroinflammation. Given the fact that the lower levels of calcium lead to reduced  
470 NFATc1 nuclear localization, it is exciting to consider if PRMT5 inhibition could be an efficient approach  
471 to modulating overactive T cell subsets.

472 In summary, our work shows that PRMT5 is an important mediator of TcR-induced AS in T cells and  
473 suggest that altered methylation in splicing proteins and changes in Ca<sup>2+</sup>/NFAT signaling underlie TcR  
474 expansion defects in PRMT5 deficient T cells. Additional studies will be needed to conclusively

475 demonstrate the contribution of specific PRMT5-dependent AS changes to concrete T cell and disease  
476 phenotypes. This work and future studies may guide development of drugs targeting these processes  
477 and provide benefit to patients with autoimmune and other T cell mediated diseases.

478

#### 479 **Acknowledgements**

480 This work was supported by funds from the NIH National Institute of Allergy and Infectious Diseases  
481 grants R01AI121405 and 1R21AI127354 (both to MGA), The Ohio State University School of Health  
482 and Rehabilitation Sciences start-up funds (to MGA), the Comprehensive Cancer Center Mass  
483 Spectrometry Resource (Core Cancer Center Support Grant P30CA016058), the NIH National Cancer  
484 Institute grant 01-CA186729 (to PNT), the Pelotonia Postdoctoral Fellowship (to GL), and the Center  
485 for Clinical and Translational Science (CCTS) Award Number Grant UL1TR002733 from the National  
486 Center For Advancing Translational Sciences. The content is solely the responsibility of the authors  
487 and does not necessarily represent the official views of the National Center For Advancing  
488 Translational Sciences or the NIH. We would like to thank the Genomic Services Laboratory of the  
489 Abigail Wexner Research Institute at Nationwide Children's Hospital for their help with RNA-Seq. We  
490 thank Amy Wetzel, Shireen Woodiga, Anthony Miller, and Saranga Wijeratne of the Genomic Services  
491 Laboratory at the Abigail Wexner Research Institute at Nationwide Children's Hospital, Columbus,  
492 Ohio, for their help with sample QC, library preparation, RNA-Seq, and analysis of data. We would also  
493 like to thank Liwen Zhang and Sophie Harvey from the genomics shared resource at OSU for their help  
494 with mass spectrometry and analysis of data.

495

#### 496 **Figure legends**

497

498 Figure 1. MAJIQ analysis reveals novel PRMT5 dependent changes in the alternative splicing of 503  
499 genes in T cells

500 **(A)** Experimental design for paired end RNA sequencing (RNA-Seq) of resting and 48hr activated,  
501 whole CD4<sup>+</sup> T cells isolated from iCD4-PRMT5<sup>fl/fl</sup> and iCD4-PRMT5<sup>Δ/Δ</sup> mice. n=3 samples, combined  
502 from 9 age-matched mice in each respective group. RNA-Seq was performed on the HiSeq4000  
503 platform with approximately 60 - 80 million reads. Figure created in Biorender. **(B,C)** Analysis of local  
504 splice variants (LSVs) and alternative junctions (AJs) from MAJIQ. Workflow identifying significantly  
505 utilized AJs by comparing LSVs in resting **(B)** or 48hr activated (act) **(C)** iCD4-PRMT5<sup>fl/fl</sup> or iCD4-  
506 PRMT5<sup>Δ/Δ</sup> CD4<sup>+</sup> T cells. LSVs with at least two or more exon junctions within the 20-80% percent spliced  
507 index ( $\Psi$ ) of reads were calculated. 3649 LSVs were observed for the wild-type (iCD4-PRMT5<sup>fl/fl</sup>) resting  
508 vs activated comparison **(B)** and 857 LSVs were observed for the iCD4-PRMT5<sup>fl/fl</sup> act **(red)** vs iCD4-  
509 PRMT5<sup>Δ/Δ</sup> act **(blue)** comparison **(C)**. **(D)** Allocation of LSVs with two or more AJs in iCD4-PRMT5<sup>fl/fl</sup> act  
510 **(red)** and iCD4-PRMT5<sup>Δ/Δ</sup> act **(blue)** groups. Shift in AJ usage is denoted as the difference in  $\Psi$  ( $\Delta\Psi$ ) and  
511 is set at a minimum of 20% between conditions. 817 AJs are PRMT5<sup>fl/fl</sup> specific and 777 AJs are  
512 PRMT5<sup>Δ/Δ</sup> specific. **(E)** Classification of 503 genes in the iCD4-PRMT5<sup>Δ/Δ</sup> act group from MAJIQ shows  
513 most of the alternative splicing (AS) events belong to exon skipping (ES). Intron retention (IR) is the  
514 next largest portion of alternative splicing changes.

515

516 Figure 2. PRMT5 methylates spliceosome Sm proteins and the RNA binding protein hnRNP K

517 (A) Experimental design for Immunoprecipitation (IP)-Mass Spectrometry (MS) of 48hr activated,  
518 whole CD4<sup>+</sup> T cells negative selection from iCD4-PRMT5<sup>fl/fl</sup> and iCD4-PRMT5<sup>Δ/Δ</sup> mice. n=3 samples,  
519 combined from 9 age-matched mice in each respective group IP: pan-symmetric dimethylation  
520 antibody SYM10. MS: Liquid Chromatography with tandem mass spectrometry (LC-MS/MS). Figure  
521 created in Biorender. (B – I) SMD1 (B), SMD2 (C), SMD3 (D), SNRPA1 (E), SNRNP70 (F), SNRPA (G),  
522 HNRNPA3 (H) and HNRNPK (I) mass spectrometry spectral reads in protein lysates from resting and  
523 48hr activated (act) whole CD4<sup>+</sup> T cells from iCD4-PRMT5<sup>fl/fl</sup> (red) and iCD4-PRMT5<sup>Δ/Δ</sup> (blue) mice after  
524 IP with the pan-symmetric dimethylation antibody SYM10. One-way ANOVA followed by Sidak's  
525 multiple-comparisons test was used. \**P* < 0.05, \*\**P* < 0.01, \*\*\**P* < 0.001, \*\*\*\**P* < 0.0001. Bar graphs  
526 display mean ± SD. (J) SYM10 immunoblot in 48hr activated CD4<sup>+</sup> T cells from iCD4-PRMT5<sup>fl/fl</sup> and iCD4-  
527 PRMT5<sup>Δ/Δ</sup> mice after IP of HNRNPK. Band corresponding to HNRNP K is observed at 55kDa. Data  
528 representative of 3 independent experiments. (K) Jurkat cells with shRNA for PRMT5 were used in a  
529 hnRNP K IP and SYM10 IB. Empty vector is a scramble shRNA control. Band corresponding to hnRNP K  
530 is observed at 55kDa. Data representative of 2 independent experiments. (L-M) Quantification of  
531 HNRNPK IP bands for PRMT5<sup>fl/fl</sup> and PRMT5<sup>Δ/Δ</sup> normalized to HNRNPK from input in 48hr activated  
532 CD4<sup>+</sup> T cells from iCD4-PRMT5<sup>fl/fl</sup> and iCD4-PRMT5<sup>Δ/Δ</sup> mice (L) or Jurkat T cells (M). Student's *t* test.  
533 \*\**P* < 0.01. Bar graphs display mean ± SD.

534

535 Figure 3. TRPM4 channel expression in T cells is affected by loss of PRMT5

536 (A) Regulation of immune processes is a key biological term discovered from gene ontology (GO)  
537 analysis. Within this umbrella we see an overlap with genes whose alternative splicing is modulated  
538 by PRMT5, belonging to Fc receptor signaling, TcR signaling and cytokine signaling. Grouping is based  
539 on the Panther classification system comparing against the *Mus musculus* reference genome. (B)  
540 Protein coding murine *Trpm4-201* splice map. Exon 20 skipping splice graphs for PRMT5<sup>fl/fl</sup> and  
541 PRMT5<sup>Δ/Δ</sup> 48 hr activated T cells are depicted. Numbers indicate the raw RNA-Seq reads for exon 20  
542 skipping occurring in the two groups. Figure created in Biorender. (C) Violin plots from VOILA shows  
543 the expected  $\Psi$  value of *Trpm4* exon 20 skipping or inclusion in PRMT5<sup>fl/fl</sup> act vs. PRMT5<sup>Δ/Δ</sup> activated T  
544 cells.  $\Psi$  value is represented in a 0 to 1 range indicating the probability of the AS event occurring. (D)  
545 Agarose gel PCR amplifying exon 19-21, showing *Trpm4* exon 20 skipping in PRMT5<sup>fl/fl</sup> and PRMT5<sup>Δ/Δ</sup> T  
546 cells (middle band). A section of exon 19 was used as a control product (lower band). Quantification  
547 of semiquantitative PCR assaying the PRMT5<sup>fl/fl</sup> normalized expression of exon 20 skipping or inclusion  
548 in PRMT5<sup>fl/fl</sup> and PRMT5<sup>Δ/Δ</sup> T cells. Student's *t* test \*\*\*\**P* < 0.0001. Box-and-whisker plots (points = max  
549 to min, line = median, box = 25th–75th percentiles). Plots display mean ± SD. (E) Representative  
550 histogram overlay of TRPM4 staining in 48hr activated PRMT5<sup>fl/fl</sup> and PRMT5<sup>Δ/Δ</sup> T cells. PRMT5<sup>fl/fl</sup> T cells  
551 are indicated in red and PRMT5<sup>Δ/Δ</sup> T cells are in blue. Isotype control denoted in grey. (F) Relative mean  
552 fluorescence intensity (MFI) and percentage of cells depicting TRPM4 lo and TRPM4 hi peaks in  
553 PRMT5<sup>fl/fl</sup> and PRMT5<sup>Δ/Δ</sup> T cells. One way ANOVA, followed by Sidak's multiple comparisons test. \**P* <  
554 0.05, \*\**P* < 0.01. Box-and-whisker plots (points = max to min, line = median, box = 25th–75th  
555 percentiles). Plots display mean ± SD.

556

557 Figure 4. PRMT5 loss in T cells reduces calcium processivity and impacts IL-2 production

558 (A) Live cell Fluo-4 trace studying total cytosolic calcium uptake in PRMT5<sup>fl/fl</sup> and PRMT5<sup>Δ/Δ</sup> T cells.  
559 PRMT5<sup>Δ/Δ</sup> T cells show a lower threshold of calcium uptake. Trace is represented as mean ± SEM, with  
560 dashed lines representing the SEM (B) Violin plot showing total cytosolic calcium uptake. Data points

561 for quantification were selected from the plateau region of the trace spike after CaCl<sub>2</sub> addition. n= 20  
562 time points in PRMT5<sup>fl/fl</sup> condition, and n= 30 time points in PRMT5<sup>Δ/Δ</sup> condition.  
563 Student's *t* test \*\*\*\**P* < 0.0001. Plot is displayed as mean ± SEM. Points = max to min, line = median.  
564 (C) NFAT localization in PRMT5<sup>fl/fl</sup> and PRMT5<sup>Δ/Δ</sup> T cells. Clear nuclear translocation is observed in  
565 PRMT5<sup>fl/fl</sup> samples. Colocalization of NFAT (red) and DAPI (blue) is used to determine nuclear  
566 translocation. (D) Quantification of percent colocalization of NFATc1-to-Nucleus in PRMT5<sup>fl/fl</sup> and  
567 PRMT5<sup>Δ/Δ</sup> T cells activated T cells, as in (C). Quantification of individual cells have been plotted and  
568 mean and SEM were used to plot the comprehensive data. Student's *t* test. (E) Quantification of IL-2  
569 ELISA. ELISA performed on supernatants from 48 hr activated PRMT5<sup>fl/fl</sup> and PRMT5<sup>Δ/Δ</sup> T cells.  
570 Student's *t* test \**P* < 0.05. Plots are displayed as mean ± SD. Points = max to min.

571

## 572 References

- 573 1. Müller AJ, Filipe-Santos O, Eberl G, Aebischer T, Späth GF, Bousso P. CD4+ T Cells Rely on a  
574 Cytokine Gradient to Control Intracellular Pathogens beyond Sites of Antigen Presentation.  
575 *Immunity*. 2012;37(1):147-157. doi:10.1016/j.immuni.2012.05.015
- 576 2. Webb LM, Amici SA, Jablonski KA, et al. PRMT5-Selective Inhibitors Suppress Inflammatory T  
577 Cell Responses and Experimental Autoimmune Encephalomyelitis. *J Immunol Baltim Md 1950*.  
578 2017;198(4):1439-1451. doi:10.4049/jimmunol.1601702
- 579 3. Webb LM, Sengupta S, Edell C, et al. Protein arginine methyltransferase 5 promotes cholesterol  
580 biosynthesis-mediated Th17 responses and autoimmunity. *J Clin Invest*. 2020;130(4):1683-  
581 1698. doi:10.1172/jci131254
- 582 4. Webb LM, Miranda JN, Amici SA, Sengupta S, Nagy G, Guerau-De-Arellano M. NF-  
583 κB/mTOR/MYC Axis Drives PRMT5 Protein Induction after T Cell Activation via Transcriptional  
584 and Non-transcriptional Mechanisms. *Front Immunol*. 2019;10(MAR):524.  
585 doi:10.3389/fimmu.2019.00524
- 586 5. Sengupta S, Kennemer A, Patrick K, Tschlis P, Guerau-de-Arellano M. Protein Arginine  
587 Methyltransferase 5 in T Lymphocyte Biology. *Trends Immunol*. 2020;41(10):918-931.  
588 doi:10.1016/j.it.2020.08.007
- 589 6. Smith-Garvin JE, Koretzky GA, Jordan MS. T Cell Activation. *Annu Rev Immunol*. 2009;27(1):591-  
590 619. doi:10.1146/annurev.immunol.021908.132706
- 591 7. Wange RL. LAT, the Linker for Activation of T Cells: A Bridge Between T Cell-Specific and  
592 General Signaling Pathways. *Sci Signal*. 2000;2000(63):re1.
- 593 8. Northrop JP, Ho SN, Chen L, et al. NF-AT components define a family of transcription factors  
594 targeted in T-cell activation. *Nature*. 1994;369(6480):497-502. doi:10.1038/369497a0
- 595 9. Lanzavecchia A, Iezzi G, Viola A. From TCR Engagement to T Cell Activation: A Kinetic View of T  
596 Cell Behavior. *Cell*. 1999;96(1):1-4. doi:10.1016/S0092-8674(00)80952-6
- 597 10. Chow C-W, Rincón M, Davis RJ. Requirement for Transcription Factor NFAT in Interleukin-2  
598 Expression. *Mol Cell Biol*. 1999;19(3):2300-2307. doi:10.1128/MCB.19.3.2300
- 599 11. Paul WE. *Fundamental Immunology*. Wolters Kluwer Health/Lippincott Williams & Wilkins;  
600 2013.

- 601 12. Amici SA, Osman W, Guerau-de-Arellano M. PRMT5 Promotes Cyclin E1 and Cell Cycle  
602 Progression in CD4 Th1 Cells and Correlates With EAE Severity. *Front Immunol.*  
603 2021;12:695947. doi:10.3389/fimmu.2021.695947
- 604 13. Martinez NM, Pan Q, Cole BS, et al. Alternative splicing networks regulated by signaling in  
605 human T cells. *RNA.* 2012;18(5):1029-1040. doi:10.1261/rna.032243.112
- 606 14. Black DL. Mechanisms of Alternative Pre-Messenger RNA Splicing. *Annu Rev Biochem.*  
607 2003;72(1):291-336. doi:10.1146/annurev.biochem.72.121801.161720
- 608 15. Ip JY, Tong A, Pan Q, Topp JD, Blencowe BJ, Lynch KW. Global analysis of alternative splicing  
609 during T-cell activation. *RNA N Y N.* 2007;13(4):563-572. doi:10.1261/rna.457207
- 610 16. Agosto LM, Gazzara MR, Radens CM, et al. Deep profiling and custom databases improve  
611 detection of proteoforms generated by alternative splicing. *Genome Res.* Published online  
612 November 14, 2019. doi:10.1101/gr.248435.119
- 613 17. Mallory MJ, Allon SJ, Qiu J, et al. Induced transcription and stability of CELF2 mRNA drives  
614 widespread alternative splicing during T-cell signaling. *Proc Natl Acad Sci U S A.*  
615 2015;112(17):E2139-E2148. doi:10.1073/pnas.1423695112
- 616 18. Shankarling G, Cole BS, Mallory MJ, Lynch KW. Transcriptome-Wide RNA Interaction Profiling  
617 Reveals Physical and Functional Targets of hnRNP L in Human T Cells. *Mol Cell Biol.*  
618 2014;34(1):71-83. doi:10.1128/MCB.00740-13
- 619 19. Martinez NM, Agosto L, Qiu J, et al. Widespread JNK-dependent alternative splicing induces a  
620 positive feedback loop through CELF2-mediated regulation of MKK7 during T-cell activation.  
621 *Genes Dev.* 2015;29(19):2054-2066. doi:10.1101/gad.267245.115
- 622 20. Ponnalagu D, Gururaja Rao S, Farber J, et al. Molecular identity of cardiac mitochondrial  
623 chloride intracellular channel proteins. *Mitochondrion.* 2016;27:6-14.  
624 doi:10.1016/j.mito.2016.01.001
- 625 21. Liu H, Sadygov RG, Yates JR. A model for random sampling and estimation of relative protein  
626 abundance in shotgun proteomics. *Anal Chem.* 2004;76(14):4193-4201.  
627 doi:10.1021/ac0498563
- 628 22. Vaquero-Garcia J, Barrera A, Gazzara MR, et al. A new view of transcriptome complexity and  
629 regulation through the lens of local splicing variations. Valcárcel J, ed. *eLife.* 2016;5:e11752.  
630 doi:10.7554/eLife.11752
- 631 23. Friesen WJ, Paushkin S, Wyce A, et al. The methylosome, a 20S complex containing JBP1 and  
632 pICln, produces dimethylarginine-modified Sm proteins. *Mol Cell Biol.* 2001;21(24):8289-8300.  
633 doi:10.1128/MCB.21.24.8289-8300.2001
- 634 24. Urlaub H, Raker VA, Kostka S, Lührmann R. Sm protein–Sm site RNA interactions within the  
635 inner ring of the spliceosomal snRNP core structure. *EMBO J.* 2001;20(1-2):187-196.  
636 doi:10.1093/emboj/20.1.187
- 637 25. Chiou N, Lynch KW. Mechanisms of Spliceosomal Assembly. In: Hertel KJ, ed. *Spliceosomal Pre-*  
638 *MRNA Splicing: Methods and Protocols.* Methods in Molecular Biology. Humana Press;  
639 2014:35-43. doi:10.1007/978-1-62703-980-2\_3

- 640 26. Price SR, Evans PR, Nagai K. Crystal structure of the spliceosomal U2B''–U2A' protein complex  
641 bound to a fragment of U2 small nuclear RNA. *Nature*. 1998;394(6694):645-650.  
642 doi:10.1038/29234
- 643 27. Ma ASW, Moran-Jones K, Shan J, et al. Heterogeneous Nuclear Ribonucleoprotein A3, a Novel  
644 RNA Trafficking Response Element-binding Protein\*. *J Biol Chem*. 2002;277(20):18010-18020.  
645 doi:10.1074/jbc.M200050200
- 646 28. Geuens T, Bouhy D, Timmerman V. The hnRNP family: insights into their role in health and  
647 disease. *Hum Genet*. 2016;135:851-867. doi:10.1007/s00439-016-1683-5
- 648 29. Samakai E, Go C, Soboloff J. Defining the Roles of Ca<sup>2+</sup> Signals during T Cell Activation. In:  
649 Soboloff J, Kappes DJ, eds. *Signaling Mechanisms Regulating T Cell Diversity and Function*. CRC  
650 Press/Taylor & Francis; 2018. Accessed June 23, 2021.  
651 <http://www.ncbi.nlm.nih.gov/books/NBK532321/>
- 652 30. Dolmetsch RE, Lewis RS, Goodnow CC, Healy JI. Differential activation of transcription factors  
653 induced by Ca<sup>2+</sup> response amplitude and duration. *Nature*. 1997;386(6627):855-858.  
654 doi:10.1038/386855a0
- 655 31. Launay P, Fleig A, Perraud A-L, Scharenberg AM, Penner R, Kinet J-P. TRPM4 Is a Ca<sup>2+</sup>-  
656 Activated Nonselective Cation Channel Mediating Cell Membrane Depolarization. *Cell*.  
657 2002;109(3):397-407. doi:10.1016/S0092-8674(02)00719-5
- 658 32. Clipstone NA, Crabtree GR. Identification of calcineurin as a key signalling enzyme in T-  
659 lymphocyte activation. *Nature*. 1992;357(6380):695-697. doi:10.1038/357695a0
- 660 33. Martinez NM, Lynch KW. Control of Alternative Splicing in Immune Responses: Many  
661 Regulators, Many Predictions, Much Still to Learn. *Immunol Rev*. 2013;253(1):216-236.  
662 doi:10.1111/imr.12047
- 663 34. Radens CM, Blake D, Jewell P, Barash Y, Lynch KW. Meta-analysis of transcriptomic variation in  
664 T-cell populations reveals both variable and consistent signatures of gene expression and  
665 splicing. *RNA N Y N*. 2020;26(10):1320-1333. doi:10.1261/rna.075929.120
- 666 35. Ajith S, Gazzara MR, Cole BS, et al. Position-dependent activity of CELF2 in the regulation of  
667 splicing and implications for signal-responsive regulation in T cells. *RNA Biol*. 2016;13(6):569-  
668 581. doi:10.1080/15476286.2016.1176663
- 669 36. Deng X, Gu L, Liu C, et al. Arginine methylation mediated by the Arabidopsis homolog of PRMT5  
670 is essential for proper pre-mRNA splicing. *Proc Natl Acad Sci*. Published online 2010.  
671 doi:10.1073/pnas.1009669107
- 672 37. Tan DQ, Li Y, Yang C, et al. PRMT5 Modulates Splicing for Genome Integrity and Preserves  
673 Proteostasis of Hematopoietic Stem Cells. *Cell Rep*. 2019;26(9):2316-2328.e6.  
674 doi:10.1016/j.celrep.2019.02.001
- 675 38. Bezzi M, Teo SX, Muller J, et al. Regulation of constitutive and alternative splicing by PRMT5  
676 reveals a role for Mdm4 pre-mRNA in sensing defects in the spliceosomal machinery. *Genes  
677 Dev*. 2013;27(17):1903-1916. doi:10.1101/gad.219899.113



- 678 39. Radzisheuskaya A, Shliaha PV, Grinev V, et al. PRMT5 methylome profiling uncovers a direct  
679 link to splicing regulation in acute myeloid leukemia. *Nat Struct Mol Biol.* 2019;26(11):999-  
680 1012. doi:10.1038/s41594-019-0313-z
- 681 40. Braun CJ, Stanciu M, Boutz PL, et al. Coordinated Splicing of Regulatory Detained Introns within  
682 Oncogenic Transcripts Creates an Exploitable Vulnerability in Malignant Glioma. *Cancer Cell.*  
683 2017;32(4):411-426.e11. doi:10.1016/j.ccell.2017.08.018
- 684 41. Metz PJ, Ching KA, Xie T, et al. Symmetric Arginine Dimethylation Is Selectively Required for  
685 mRNA Splicing and the Initiation of Type I and Type III Interferon Signaling. *Cell Rep.*  
686 2020;30(6):1935-1950.e8. doi:10.1016/j.celrep.2020.01.054
- 687 42. Mallory MJ, McClory SP, Chatrikhi R, Gazzara MR, Ontiveros RJ, Lynch KW. Reciprocal  
688 regulation of hnRNP C and CELF2 through translation and transcription tunes splicing activity in  
689 T cells. *Nucleic Acids Res.* 2020;48(10):5710-5719. doi:10.1093/nar/gkaa295
- 690 43. Friesen WJ, Massenet S, Paushkin S, Wyce A, Dreyfuss G. SMN, the Product of the Spinal  
691 Muscular Atrophy Gene, Binds Preferentially to Dimethylarginine-Containing Protein Targets.  
692 *Mol Cell.* 2001;7(5):1111-1117. doi:10.1016/S1097-2765(01)00244-1
- 693 44. Friesen WJ, Wyce A, Paushkin S, et al. A novel WD repeat protein component of the  
694 methylosome binds Sm proteins. *J Biol Chem.* 2002;277(10):8243-8247.  
695 doi:10.1074/jbc.M109984200
- 696 45. Meister G, Eggert C, Bühler D, Brahms H, Kambach C, Fischer U. Methylation of Sm proteins by  
697 a complex containing PRMT5 and the putative U snRNP assembly factor pICln. *Curr Biol CB.*  
698 2001;11(24):1990-1994. doi:10.1016/s0960-9822(01)00592-9
- 699 46. Dreyfuss G, Kim VN, Kataoka N. Messenger-RNA-binding proteins and the messages they carry.  
700 *Nat Rev Mol Cell Biol.* 2002;3(3):195-205. doi:10.1038/nrm760
- 701 47. Gao G, Dhar S, Bedford MT. PRMT5 regulates IRES-dependent translation via methylation of  
702 hnRNP A1. *Nucleic Acids Res.* 2017;45(8):4359-4369. doi:10.1093/nar/gkw1367
- 703 48. Clower CV, Chatterjee D, Wang Z, Cantley LC, Heiden MG, Krainer AR. The alternative splicing  
704 repressors hnRNP A1/A2 and PTB influence pyruvate kinase isoform expression and cell  
705 metabolism. *Proc Natl Acad Sci.* 2010;107(5):1894-1899. doi:10.1073/pnas.0914845107
- 706 49. Talukdar I, Sen S, Urbano R, Thompson J, Iii JRY, Webster NJG. hnRNP A1 and hnRNP F  
707 Modulate the Alternative Splicing of Exon 11 of the Insulin Receptor Gene. *PLOS ONE.*  
708 2011;6(11):e27869. doi:10.1371/journal.pone.0027869
- 709 50. Topp JD, Jackson J, Melton AA, Lynch KW. A cell-based screen for splicing regulators identifies  
710 hnRNP LL as a distinct signal-induced repressor of CD45 variable exon 4. *RNA.*  
711 2008;14(10):2038-2049. doi:10.1261/rna.1212008
- 712 51. West KO, Scott HM, Torres-Odio S, West AP, Patrick KL, Watson RO. The Splicing Factor hnRNP  
713 M Is a Critical Regulator of Innate Immune Gene Expression in Macrophages. *Cell Rep.*  
714 2019;29(6):1594-1609.e5. doi:10.1016/j.celrep.2019.09.078
- 715 52. Bertin S, Raz E. Transient Receptor Potential (TRP) channels in T cells. *Semin Immunopathol.*  
716 2016;38(3):309-319. doi:10.1007/s00281-015-0535-z

717 53. Weber KS, Hildner K, Murphy KM, Allen PM. Trpm4 differentially regulates Th1 and Th2  
 718 function by altering calcium signaling and NFAT localization. *J Immunol Baltim Md 1950.*  
 719 2010;185(5):2836-2846. doi:10.4049/jimmunol.1000880

720

721 Figure 1

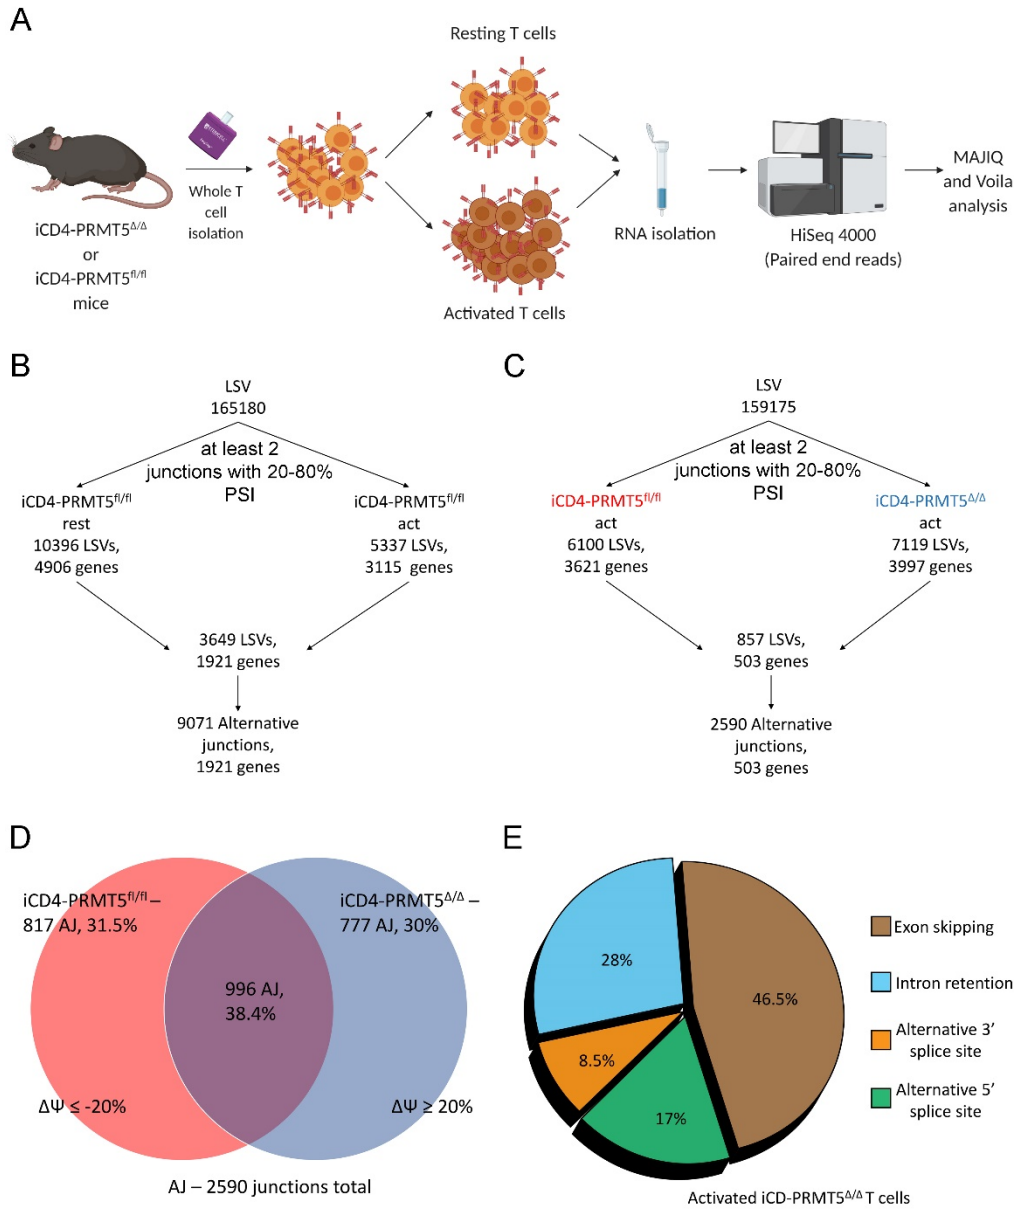

722

723

724 Figure 2

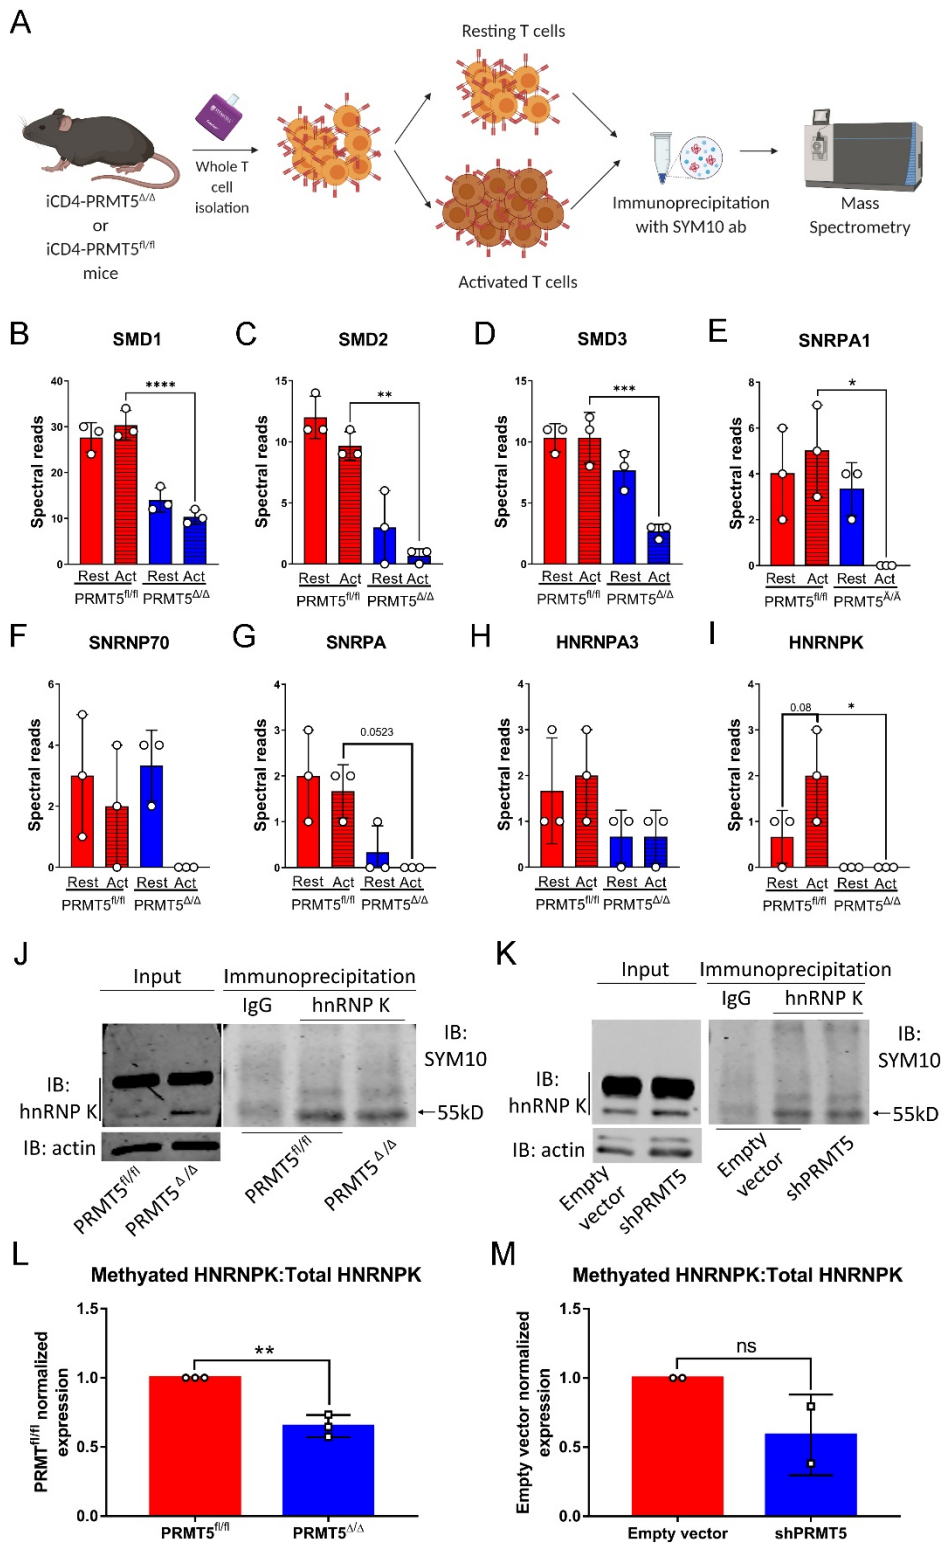

725

726

727 Figure 3

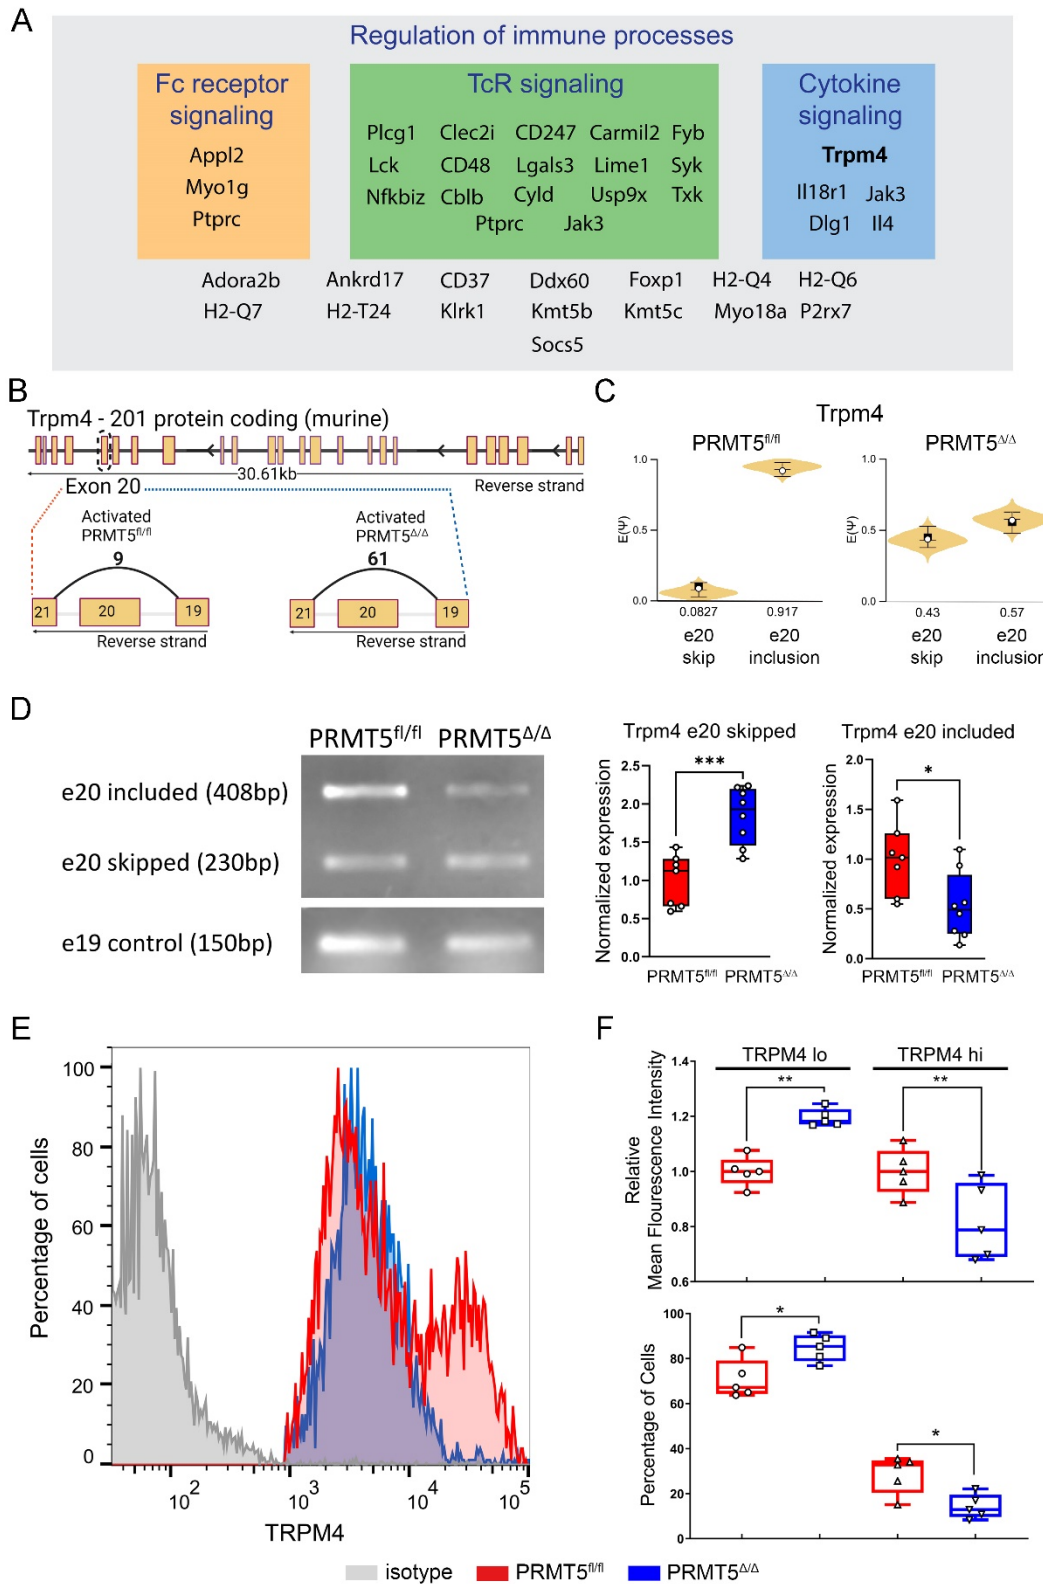

728

729

730 Figure 4

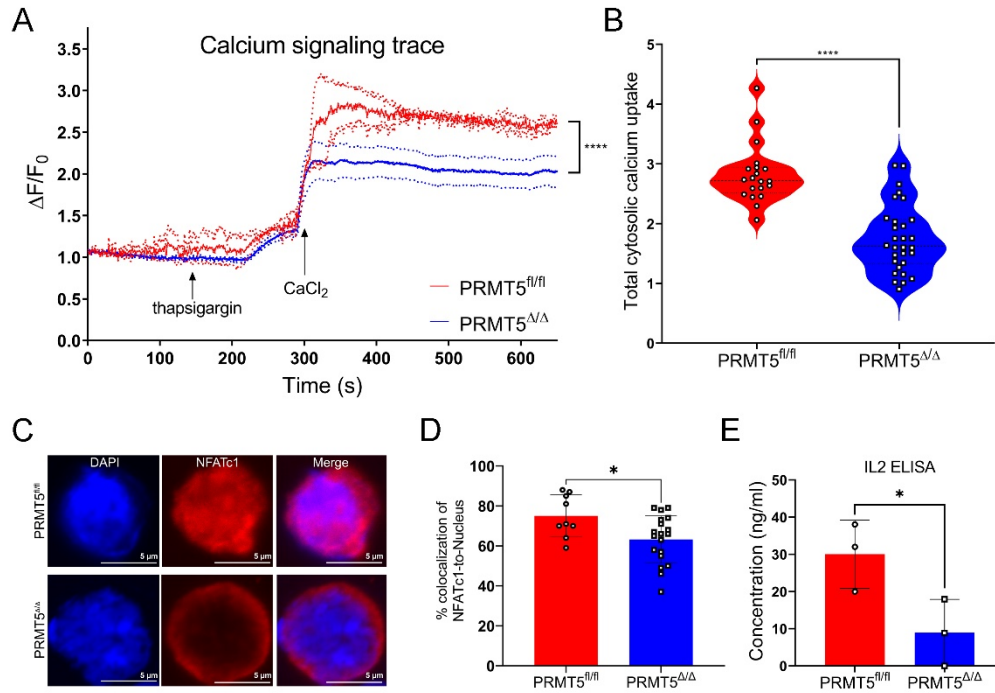

Source: https://www.biorxiv.org/content/10.1101/2021.08.24.457384v1.full.pdf
